# Supplementary material for: Lorlatinib with or without chemotherapy in ALK-driven refractory/relapsed neuroblastoma: phase 1 trial results
Source: PubMed Central journal article supplement (PMC10202811; doi:10.1038/s41591-023-02297-5), 2023-04-03

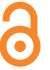

---

# Lorlatinib with or without chemotherapy in ALK-driven refractory/relapsed neuroblastoma: phase 1 trial results

---

In the format provided by the authors and unedited

---

**Supplementary Table 1. Tumor Tissue Verses ctDNA Baseline ALK Results**

| <b>Best overall response</b> | <b>Tumor ALK</b>  | <b>Tumor source/ timepoint</b> | <b>ctDNA baseline</b>       | <b>Prior ALK inhibitor</b> |
|------------------------------|-------------------|--------------------------------|-----------------------------|----------------------------|
| PD (Course 1)                | F1174L            | Bone/Relapse                   | F1174<br>F1245<br>R1275     | Alectinib + Chemotherapy   |
| PR (27 Courses)              | D1276_R1279>E     | Soft tissue/Relapse            | D1276_R1279>E<br>G1202R     | Crizotinib x 3 years       |
| PD (Course 2)                | ALK Amplification | Soft tissue/Refractory         | ALK Amplification<br>F1174L | No Prior ALK TKI           |

**Supplementary Table 2. MIBG Curie Scores at enrollment and Best Overall Response**

| Patient ID                 | 32  | 10 | 30 | 12    | 9   | 26     | 40  | 17     | 3      | 11   | 21   | 25   | 2    | 38   | 31   |
|----------------------------|-----|----|----|-------|-----|--------|-----|--------|--------|------|------|------|------|------|------|
| Enrollment Curie           | 2   | 4  | 5  | 6     | 10  | 11     | 10  | 15     | 18     | 1    | 3    | 2    | 5    | 3    | 3    |
| Minimum Curie              | 14  | 6  | 7  | 8     | 9   | 9      | 3   | 2      | 1      | 0    | 0    | 0    | 0    | 0    | 0    |
| Best overall response      | PD  | PD | PD | PD    | PD  | PD     | MR  | MR     | PR     | SD   | SD   | SD   | MR   | PR   | CR   |
| Curie Score Percent Change | 600 | 50 | 40 | 33.33 | -10 | -18.18 | -70 | -86.66 | -94.44 | -100 | -100 | -100 | -100 | -100 | -100 |

PD; Progressive disease, SD; Stable disease, MR; Minimal response, PR; Partial response, CR; Complete response

**Supplementary Table 3: Neuropsychological Administration Procedures by Age Group**

| Age at Testing<br>(Years:<br>Months) | Patient Testing/Self Report                                                                                               | Parent Report                                                                                                                                                                                                                                                                                                 | Duration of Testing for Parents | Duration of Testing for Patients |
|--------------------------------------|---------------------------------------------------------------------------------------------------------------------------|---------------------------------------------------------------------------------------------------------------------------------------------------------------------------------------------------------------------------------------------------------------------------------------------------------------|---------------------------------|----------------------------------|
| 1:1 to 1:11                          | 1. Bayley-III (only at <u>baseline, course 2, and every 6 months</u> for duration of treatment- e.g., course 8, 14, etc.) | 1. ABAS-3 Parent/Primary Caregiver Form (Ages 0-5)<br>2. PedsQL Infant Scales (13-24 months)                                                                                                                                                                                                                  | ~ 20 minutes                    | ~ 60 - 90 minutes                |
| 2:0 – 2:11                           | 1. Bayley-III (only at <u>baseline, course 2, and every 6 months</u> for duration of treatment- e.g., course 8, 14, etc.) | 1. ABAS-3 Parent/Primary Caregiver Form (Ages 0-5)<br>2. BASC-3 Parent Rating Scales-Preschool (Ages 2-5)<br>3. BRIEF- Preschool Version<br>4. PedsQL Generic Version – Parent Report for Toddlers (Ages 2-4)<br>5. PedsQL Multidimensional Fatigue Parent Report for Toddlers (Ages 2-4)                     | ~ 50 minutes                    | ~ 60 - 90 minutes                |
| 3:0 – 4:11                           | 1. Cogstate (Detection, Identification)                                                                                   | 1. ABAS-3 Parent/Primary Caregiver Form (Ages 0-5)<br>2. BASC-3 Parent Rating Scales-Preschool (Ages 2-5)<br>3. BRIEF- Preschool Version<br>4. PedsQL Generic Version – Parent Report for Toddlers (Ages 2-4)<br>5. PedsQL Multidimensional Fatigue – Parent Report for Toddlers (Ages 2-4)                   |                                 | ~ 10 minutes                     |
| 5:0 – 5:11                           | 1. Cogstate (Detection, Identification)                                                                                   | 1. ABAS-3 Parent/Primary Caregiver Form (Ages 0-5)<br>2. BASC-3 Parent Rating Scales-Preschool (Ages 2-5)<br>3. BRIEF- Preschool Version<br>4. PedsQL Generic Version – Parent Report for Young Children (Ages 5-7)<br>5. PedsQL Multidimensional Fatigue – Parent Report for Young Children (Ages 5-7)<br>6. |                                 |                                  |

|              |                                                                                                                                                                               |                                                                                                                                                                                                                                                                                                      |                   |                 |
|--------------|-------------------------------------------------------------------------------------------------------------------------------------------------------------------------------|------------------------------------------------------------------------------------------------------------------------------------------------------------------------------------------------------------------------------------------------------------------------------------------------------|-------------------|-----------------|
| 6:0 – 6:11   | 1. Cogstate<br>( <i>Detection, Identification, One Card Learning, One Back, Groton Maze Learning Task</i> )                                                                   | 1. ABAS-3 Parent Form<br>(Ages 5-21)<br>2. BASC-3 Parent Rating Scales-Child (Ages 6-11)<br>3. BRIEF<br>4. PedsQL Generic Version – Parent Report for Young Children (Ages 5-7)<br>5. PedsQL Multidimensional Fatigue – Parent Report for Young Children (Ages 5-7)                                  | ~ 50 minutes      |                 |
| 7:0-7:11     | 1. Cogstate<br>( <i>Detection, Identification, One Card Learning, One Back, Groton Maze Learning Task</i> )                                                                   | 1. ABAS-3 Parent Form<br>(Ages 5-21)<br>2. BASC-3 Parent Rating Scales-Child (Ages 6-11)<br>3. BRIEF<br>4. PedsQL Generic Version – Parent Report for Young Children (Ages 5-7)<br>5. PedsQL Multidimensional Fatigue – Parent Report for Young Children (Ages 5-7)<br>6. CSSRS – Children’s Version |                   |                 |
| 8:0-9:11     | 1. Cogstate<br>( <i>Detection, Identification, One Card Learning, One Back, Groton Maze Learning Task</i> )                                                                   | 1. ABAS-3 Parent Form<br>(Ages 5-21)<br>2. BASC-3 Parent Rating Scales-Child (Ages 6-11)<br>3. BRIEF<br>4. PedsQL Generic Version – Parent Report for Children (Ages 8-12)<br>5. PedsQL Multidimensional Fatigue – Parent Report for Children (Ages 8-12)<br>6. CSSRS – Children’s Version           | ~ 50 – 55 minutes | ~ 30-40 minutes |
| 10:0-11:11   | 1. Cogstate<br>( <i>International Shopping List, Detection, Identification, One Card Learning, One Back, Groton Maze Learning Task, International Shopping List Delayed</i> ) | 1. ABAS-3 Parent Form<br>(Ages 5-21)<br>2. BASC-3 Parent Rating Scales-Child (Ages 6-11)<br>3. BRIEF<br>4. PedsQL Generic Version – Parent Report for Children (Ages 8-12)<br>5. PedsQL Multidimensional Fatigue – Parent Report for Children (Ages 8-12)<br>6. CSSRS – Children’s Version           |                   | ~ 35-45 minutes |
| 12:0 – 12:11 | 1. Cogstate<br>( <i>International Shopping List, Detection, Identification, One Card Learning, One Back, Groton</i> )                                                         | 1. ABAS-3 Parent Form<br>(Ages 5-21)                                                                                                                                                                                                                                                                 |                   |                 |

|              |                                                                                                                                                                                                                                                                                                                                                                                                                                                                                                                                                              |                                                                                                                                                                                                                                                                                                                                                         |                 |                 |
|--------------|--------------------------------------------------------------------------------------------------------------------------------------------------------------------------------------------------------------------------------------------------------------------------------------------------------------------------------------------------------------------------------------------------------------------------------------------------------------------------------------------------------------------------------------------------------------|---------------------------------------------------------------------------------------------------------------------------------------------------------------------------------------------------------------------------------------------------------------------------------------------------------------------------------------------------------|-----------------|-----------------|
|              | <i>Maze Learning Task, International Shopping List Delayed)</i>                                                                                                                                                                                                                                                                                                                                                                                                                                                                                              | <ol style="list-style-type: none"> <li>2. BASC-3 Parent Ratings Scales – Adolescent (Ages 12-21)</li> <li>3. BRIEF</li> <li>4. PedsQL Generic Version – Parent Report for Children (Ages 8-12)</li> <li>5. PedsQL Multidimensional Fatigue – Parent Report for Children (Ages 8-12)</li> <li>6. CSSRS</li> </ol>                                        | ~ 50-55 minutes | ~ 35-45 minutes |
| 13:0 – 17:11 | <ol style="list-style-type: none"> <li>1. Cogstate (International Shopping List, Detection, Identification, One Card Learning, One Back, Groton Maze Learning Task, International Shopping List Delayed)</li> </ol>                                                                                                                                                                                                                                                                                                                                          | <ol style="list-style-type: none"> <li>1. ABAS-3 Parent Form (Ages 5-21)</li> <li>2. BASC-3 Parent Ratings Scales – Adolescent (Ages 12-21)</li> <li>3. BRIEF</li> <li>4. PedsQL Generic Version – Parent Report for Teens (Ages 13-18)</li> <li>5. PedsQL Multidimensional Fatigue – Parent Report for Teens (Ages 13-18)</li> <li>6. CSSRS</li> </ol> |                 |                 |
| 18:0 – 25:11 | <ol style="list-style-type: none"> <li>1. Cogstate (International Shopping List, Detection, Identification, One Card Learning, One Back, Groton Maze Learning Task, International Shopping List Delayed)</li> <li>2. ABAS-3 Adult Self-Report Form (Ages 16-89)</li> <li>3. BASC-3 Self-Report College (Ages 18-25)</li> <li>4. BRIEF - Adult Self Report</li> <li>5. PedsQL Generic Version - Young Adult Report (Ages 18-25)</li> <li>6. PedsQL Multidimensional Fatigue - Young Adult Report (Ages 18-25)</li> <li>7. BDI-II</li> <li>8. CSSRS</li> </ol> | No Parent Reports                                                                                                                                                                                                                                                                                                                                       | N/A             | ~80-90 minutes  |
| ≥26:0        | <ol style="list-style-type: none"> <li>1. Cogstate (International Shopping List, Detection, Identification, One Card Learning, One Back, Groton Maze Learning Task, International Shopping List Delayed)</li> <li>2. ABAS-3 Adult Self-Report Form (Ages 16-89)</li> <li>3. BRIEF - Adult Self Report</li> <li>4. PedsQL Generic Version - Adult Report (Ages ≥26)</li> <li>5. PedsQL Multidimensional Fatigue - Adult Report (Ages ≥26)</li> <li>6. BDI-II</li> <li>7. CSSRS</li> </ol>                                                                     |                                                                                                                                                                                                                                                                                                                                                         |                 |                 |

**Supplementary Figure 1.** Responses on cohort A1 by age at enrollment. Statistically evaluated using two-sided T-Test.

| Cohort | n  | Mean Age (range) [n] for CR+PR+MR | Mean Age (range) [n] for SD+PD | t-test p-value |
|--------|----|-----------------------------------|--------------------------------|----------------|
| A1     | 23 | 10.5 (6-17) [7]                   | 5.12 (2-9) [16]                | 0.0006         |

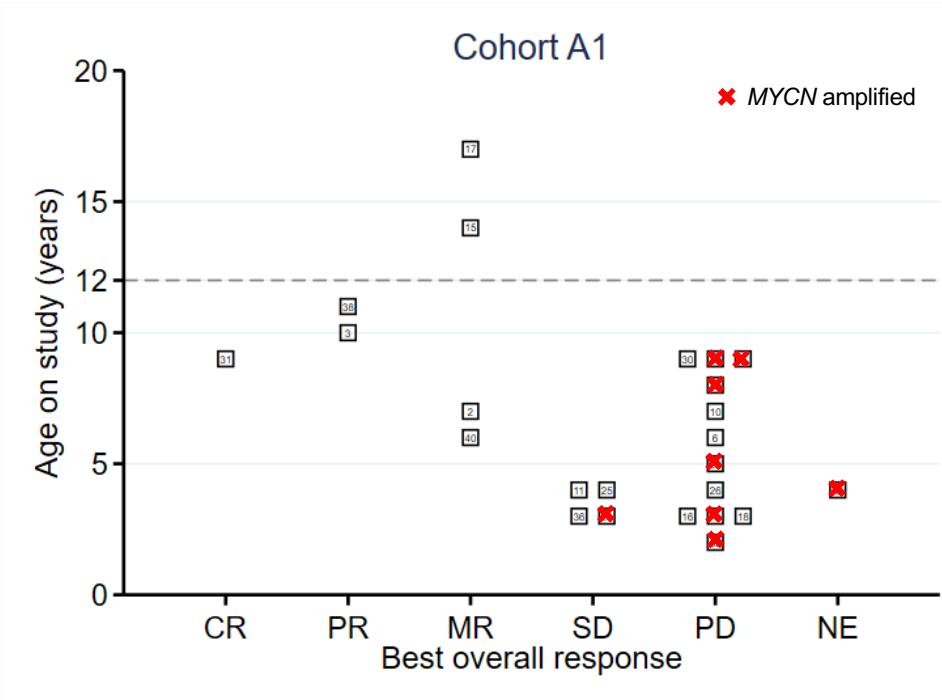

Supplement: 41591_2023_2297_MOESM1_ESM.pdf [file 41591_2023_2297_MOESM1_ESM.pdf]
